# Supplementary material
Source: PubMed Central journal article supplement (PMC3961844)

Figure S1

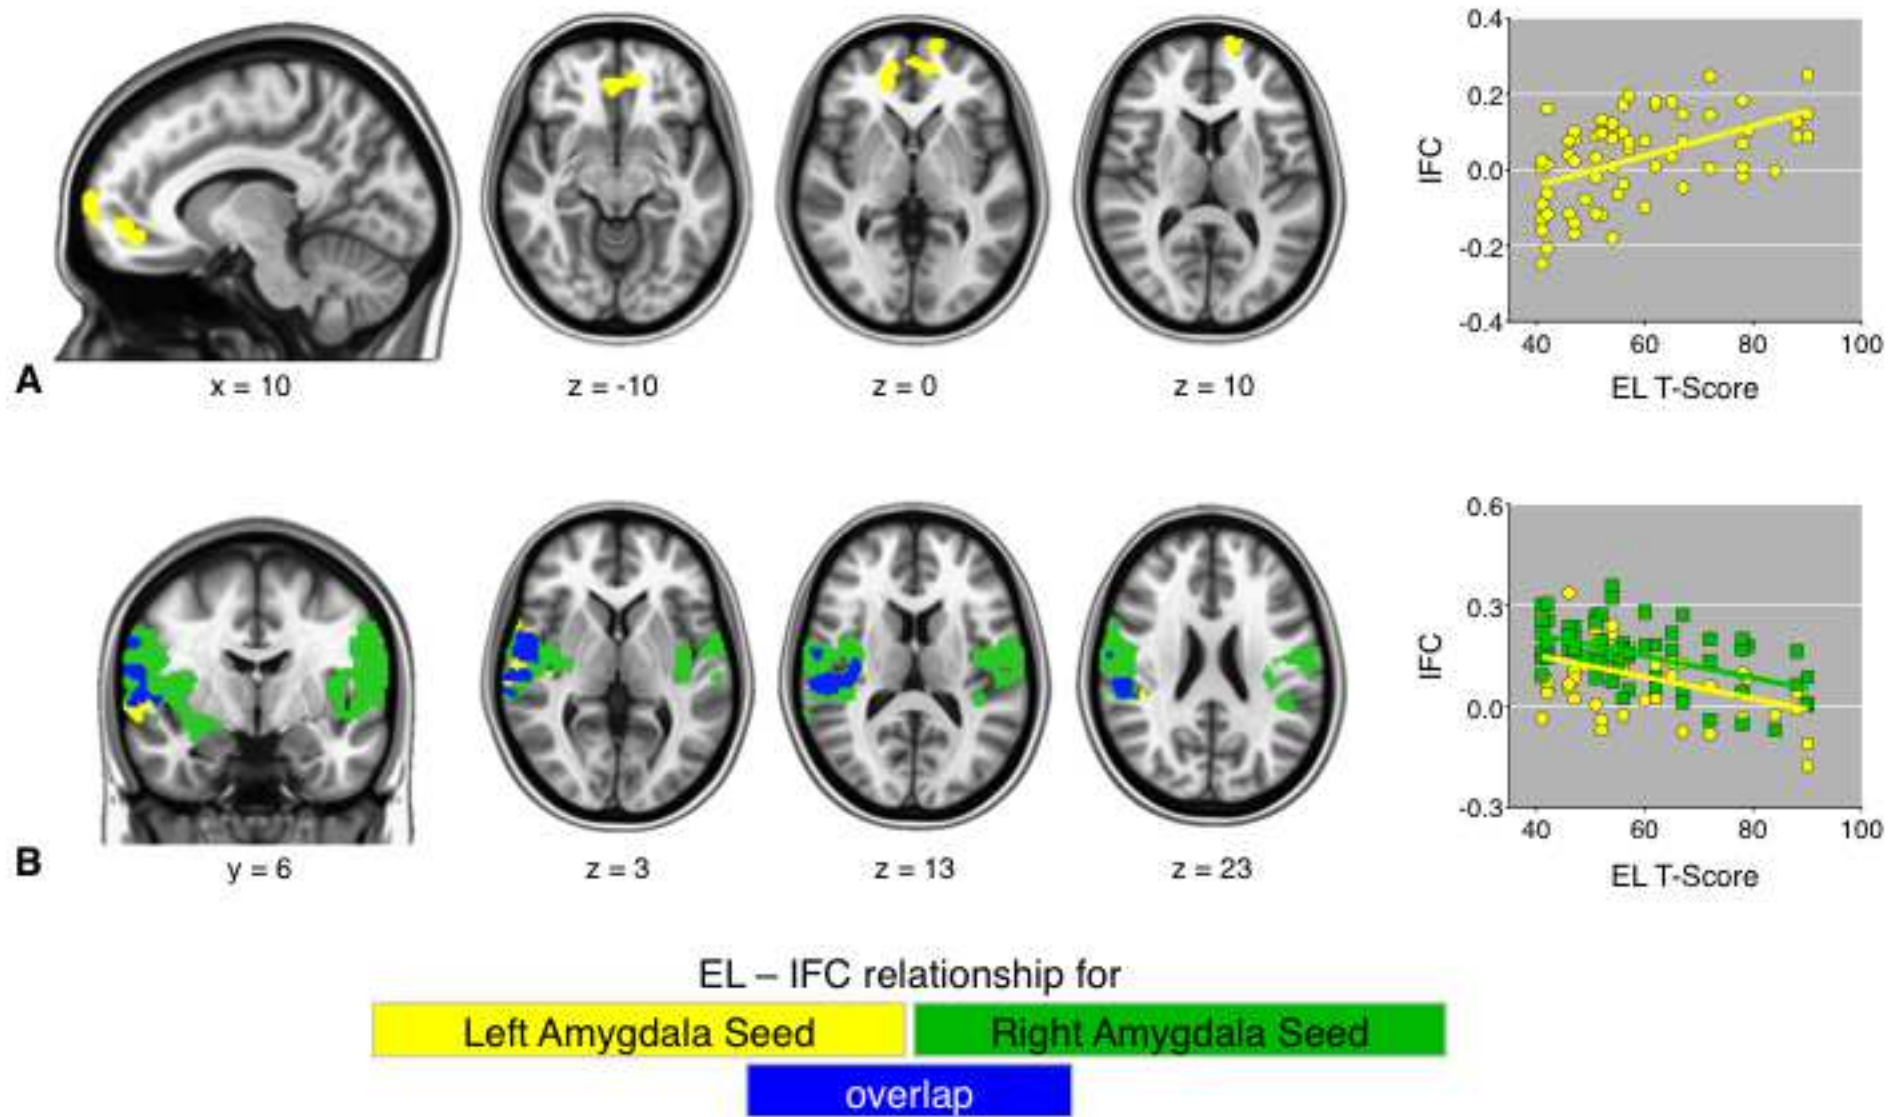

Supplement: NIHMS550565-supplement-01.pdf [file NIHMS550565-supplement-01.pdf]
